# Supplementary material for: A high-throughput virus-induced gene silencing protocol identifies genes involved in multi-stress tolerance
Source: PubMed Central journal article supplement (PMC3879149; doi:10.1186/1471-2229-13-193), 2013-12-01
Supplement: 1471-2229-13-193-S3.pdf [file 1471-2229-13-193-S3.pdf]

|                                                                                                                                                                                 | Gene name       | Primer sequence (5'-3')                                                    | Product size |
|---------------------------------------------------------------------------------------------------------------------------------------------------------------------------------|-----------------|----------------------------------------------------------------------------|--------------|
| <b>A. Primers used for amplification of <i>Nicotiana benthamiana</i> or <i>Nicotiana tabacum</i> homologs for cloning into <i>pTRV2</i> vector following Gateway technology</b> |                 |                                                                            |              |
| 1                                                                                                                                                                               | <i>NbSOS1</i>   | -TCTTTTCAGCTCCTGCACCGTTACT-<br>-TGACCAGTTTCGTTCCACATCCTGT-                 | 302          |
| 2                                                                                                                                                                               | <i>NbAPX</i>    | -ACGAAAGATGGTCCAGGAAACCCT-<br>-TCGGAAAGCTCTCTCTTTCCGGTT-                   | 323          |
| 3                                                                                                                                                                               | <i>NbGST</i>    | -GCATGCAAAGGGAGAGTGTGGCTA-<br>-ACTCCTCAAGTTGGCATCCTCCAA-                   | 321          |
| 4                                                                                                                                                                               | <i>NbCAT3</i>   | -TGGAGTCAAGTGCTTGTGGAGGA-<br>-AAACACCAGGGACAACAATGGCAG-                    | 281          |
| 5                                                                                                                                                                               | <i>NbDHAR</i>   | -AGGGCACTTCTGACATTGGAGGAA-<br>-ACATATGGTCCGTGAGCCTTGAGA-                   | 318          |
| 6                                                                                                                                                                               | <i>NbGPX</i>    | -AATGTTGCATCACAGTGTGGCCTG-<br>-TGGTTGGAGAGTAGCGATCAACGA-                   | 321          |
| 7                                                                                                                                                                               | <i>NbFER2</i>   | -GCATGCTGTAGCCACACGAAACAA-<br>-AGCACTGGGACTTTCCATCACCAA-                   | 312          |
| 8                                                                                                                                                                               | <i>NbHSP101</i> | -TGATCCTCTGTCCCACAAGCAGTT-<br>-TCACAAGCCCTCCATTCTTCTCCA-                   | 277          |
| 9                                                                                                                                                                               | <i>NbBIP5</i>   | -TTTGATGGCAAGGAGCCCAACAAG-<br>-AGCAGTCTGCAGTCCTTTGTGAGA-                   | 282          |
| 10                                                                                                                                                                              | <i>NbP5CS1</i>  | -TGTTGAAAGGAGGAAAGGAGGCCA-<br>-CATTGCATTGCAGGCTGCTGGATA-                   | 305          |
| 11                                                                                                                                                                              | <i>NbCBL1</i>   | -ATGGGCTGTTTCCAGTCTACAGCA-<br>-TCTTCTTGTGAGGCATTTGGGTGG-                   | 392          |
| 12                                                                                                                                                                              | <i>NbMYC2</i>   | -ATTCTTTTTCATATACTTTATATAG-<br>-GGGAAGGAAGGGAAATCGCCG-                     | 378          |
| 13                                                                                                                                                                              | <i>NbGBP16</i>  | -CGATGAGACGTCCTGGAAGAAG-<br>-CGAATTGAGACGGGAAAAATAAG-                      | 426          |
| 14                                                                                                                                                                              | <i>NbRBX1</i>   | -GACTGTTAGACGGAATATTCCC-<br>-TTGTCAGTCAAATAGCACCTTATC-                     | 382          |
| 15                                                                                                                                                                              | <i>NbPAL1</i>   | -TCTTCGAACATCTCCACAGTGGCT-<br>-TGCAATTTGAGACACCCTTGAGTCC-                  | 305          |
| 16                                                                                                                                                                              | <i>NtEDS1</i>   | -GAGTATCAGACCAAGTGTGATATCCG-<br>-GCTGAGGTGGGAGTGTTCACC-                    | 548          |
| 17                                                                                                                                                                              | <i>NtNPR1</i>   | -GAAAGAGCCTAAAATTGTAGTGTC-<br>-CTATTTCTAAAAGGGACCTTATT-                    | 753          |
| 18                                                                                                                                                                              | <i>NtRAR1</i>   | -GTGCCATCCTTTGGTGCATGGAGG-<br>-AGGAAAGCACACAACAGAAAAACC-                   | 468          |
| 19                                                                                                                                                                              | <i>NbADR1</i>   | -AGGGCTTCCTTTGGCTCTTAAGGT-<br>-TCTCCAGCTCGTGCATCTTTGACT-                   | 320          |
| 20                                                                                                                                                                              | <i>NbMC</i>     | -ATCCTTGCCTCTTTCCACCCTCAT-<br>-CCGGCATAAACCTCTTGTTCCT-                     | 285          |
| 21                                                                                                                                                                              | <i>NbCYCD2</i>  | -GTGCAATTGTTAGCTGTGGCCTGT-<br>-CAGACATTGCCACTGATGCTGCAA-                   | 310          |
| 22                                                                                                                                                                              | <i>NbCTR1</i>   | -CGGGAATTCGTTGCAATTATGAAGCGGTTGCG-<br>-CGGCTCGAGTCATGAGAGCAACTGCATGTCTGT-  | 369          |
| 23                                                                                                                                                                              | <i>NbWRKY1</i>  | -CGGGAATTCGGATGATACTCCACCTATTAAGTC-<br>-CGGCTCGAGTGCACCAATATGAACAACCATGTC- | 538          |
| 24                                                                                                                                                                              | <i>NtMEK1</i>   | -AGATCTTCAGTTCTCATTGGAAGATCTTGA-                                           | 347          |

|                                           |                                                    |                                                                                            |     |
|-------------------------------------------|----------------------------------------------------|--------------------------------------------------------------------------------------------|-----|
|                                           |                                                    | -CGGTCTAGAGTAAAACCTGCTTGCAAACAACCTGC-                                                      |     |
| 25                                        | <i>NbWRKY2</i>                                     | -CGGGAATTCGACCAAGTCTCCGGAACAAGTGA-<br>-CGGCTCGAGCGTAGCAGTGCTATAGGTTGCTG-                   | 512 |
| 26                                        | <i>NbETR1</i>                                      | -AATACATGCCTGGTGAGGTGGT-<br>-ACGTTGCTCCGGAGTTAGATCA-                                       | -   |
| 27                                        | <i>NbFLS</i>                                       | -GCTCATCACTTGGGCTTGGGTTAGAAG-<br>-TGGATTGGCCTCATTAACCAGCTTAGG-                             | 416 |
| 28                                        | <i>NbMYB1</i>                                      | CGGGAATTCATGGTGAGAGCTCCTTGTTGTGAGAAA<br>ATG-<br>CGGCTCGAGGCACTGGGCTATCAATGTGTTTTTGTG<br>T- | 298 |
| <b>B. Primers used in RT-PCR analysis</b> |                                                    |                                                                                            |     |
| 29                                        | <i>NbSOS1</i>                                      | -GTTCAAGCAGCATACTGGGAAATG-<br>-CAAGCTTCCGGTGGACAAAAC-                                      | 199 |
| 30                                        | <i>NbP5CS1</i>                                     | -GATGTGATTGATCTTGTTATACC-<br>-CCTTATGAACGAGAAGAGTTTC-                                      | 217 |
| 31                                        | <i>NbHSP101</i>                                    | -GGAAGGCCACAGCAACCAAC-<br>-CAGAGTGTTGTTCCATGTAC-                                           | 154 |
| 32                                        | <i>NbGPX</i>                                       | -ATGACGGTTCAACATTGTCAC-<br>-CTTACACTTCACACTTACATAG-                                        | 181 |
| 33                                        | <i>NtEDS1</i>                                      | -GAGAAGTGAAAGATGAGCTG-<br>-CTACTGTACCAACCATCAAC-                                           | 160 |
| 34                                        | <i>NbPDS</i><br>(NCBI<br>accession #<br>DQ469932)  | -GCATTTTGATTGATTGCTTTGAAC-<br>-CACAATCGGCATGCAAAGTC-                                       | 101 |
| 35                                        | <i>NbChlH</i><br>(NCBI<br>accession #<br>AF014051) | -TGCAGTGGAGAAAGAAAGGGAC-<br>-CCCCACAACCTCAAAGAAGC-                                         | 190 |
| 36                                        | <i>TRV2-CP</i>                                     | -CTGGGTTACTAGCGGCACTGAATA-<br>-TCCACCAAACCTTAATCCCGAATAC-                                  | -   |
| 37                                        | <i>NbEF1<math>\alpha</math></i>                    | -CACGCATTGCTTGCTTTCA-<br>-TCCATCTTGTTACAGCAGCAAATC-                                        | 220 |
